# Supplementary material for: The Effective Population Size of Malaria Mosquitoes: Large Impact of Vector Control
Source: PubMed Central journal article supplement (PMC3521722; doi:10.1371/journal.pgen.1003097), 2012-12-13
Supplement: pgen.1003097.s001.pdf [file pgen.1003097.s001.pdf]

Allelic Richness (AR)

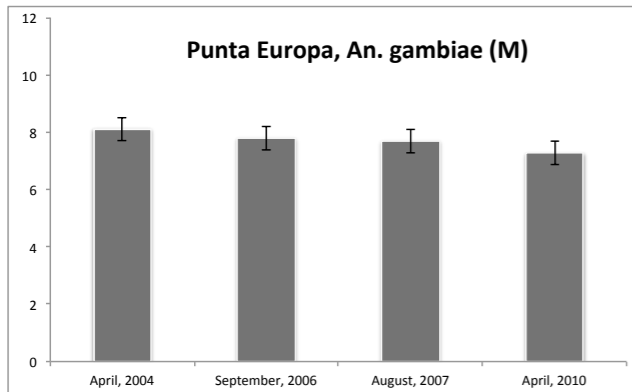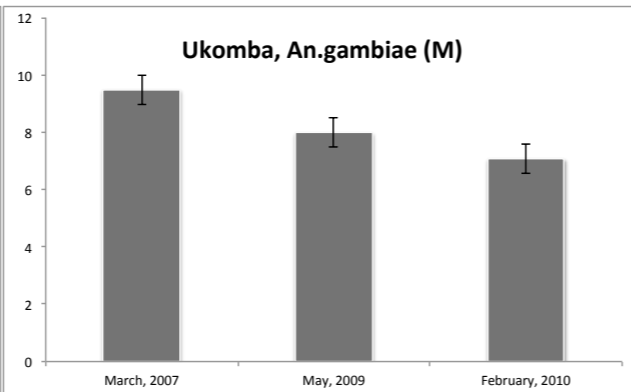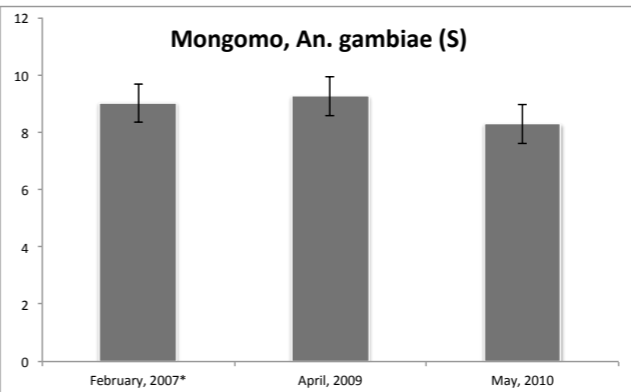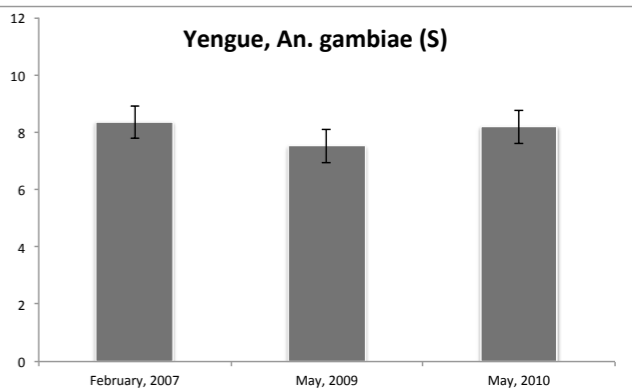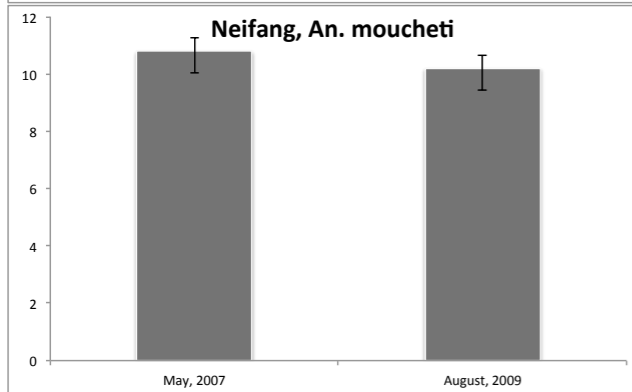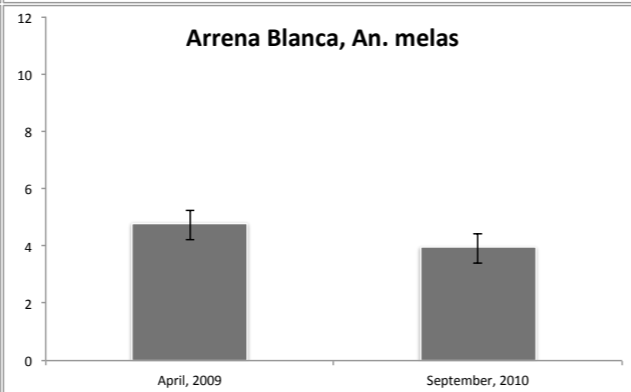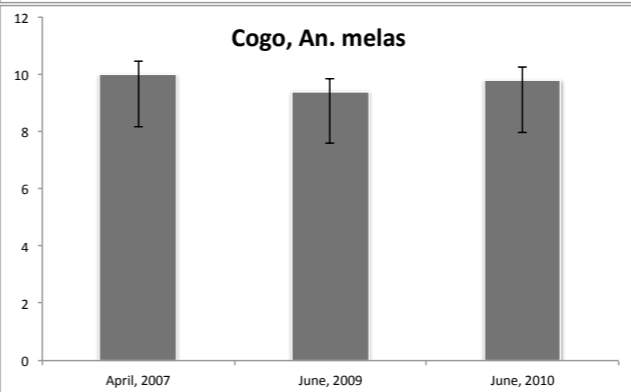

Sample Time Points
