# Supplementary material for: The Effective Population Size of Malaria Mosquitoes: Large Impact of Vector Control
Source: PubMed Central journal article supplement (PMC3521722; doi:10.1371/journal.pgen.1003097), 2012-12-13
Supplement: pgen.1003097.s002.pdf [file pgen.1003097.s002.pdf]

# Effective Number of Alleles ( $A_e$ )

Effective Number of Alleles

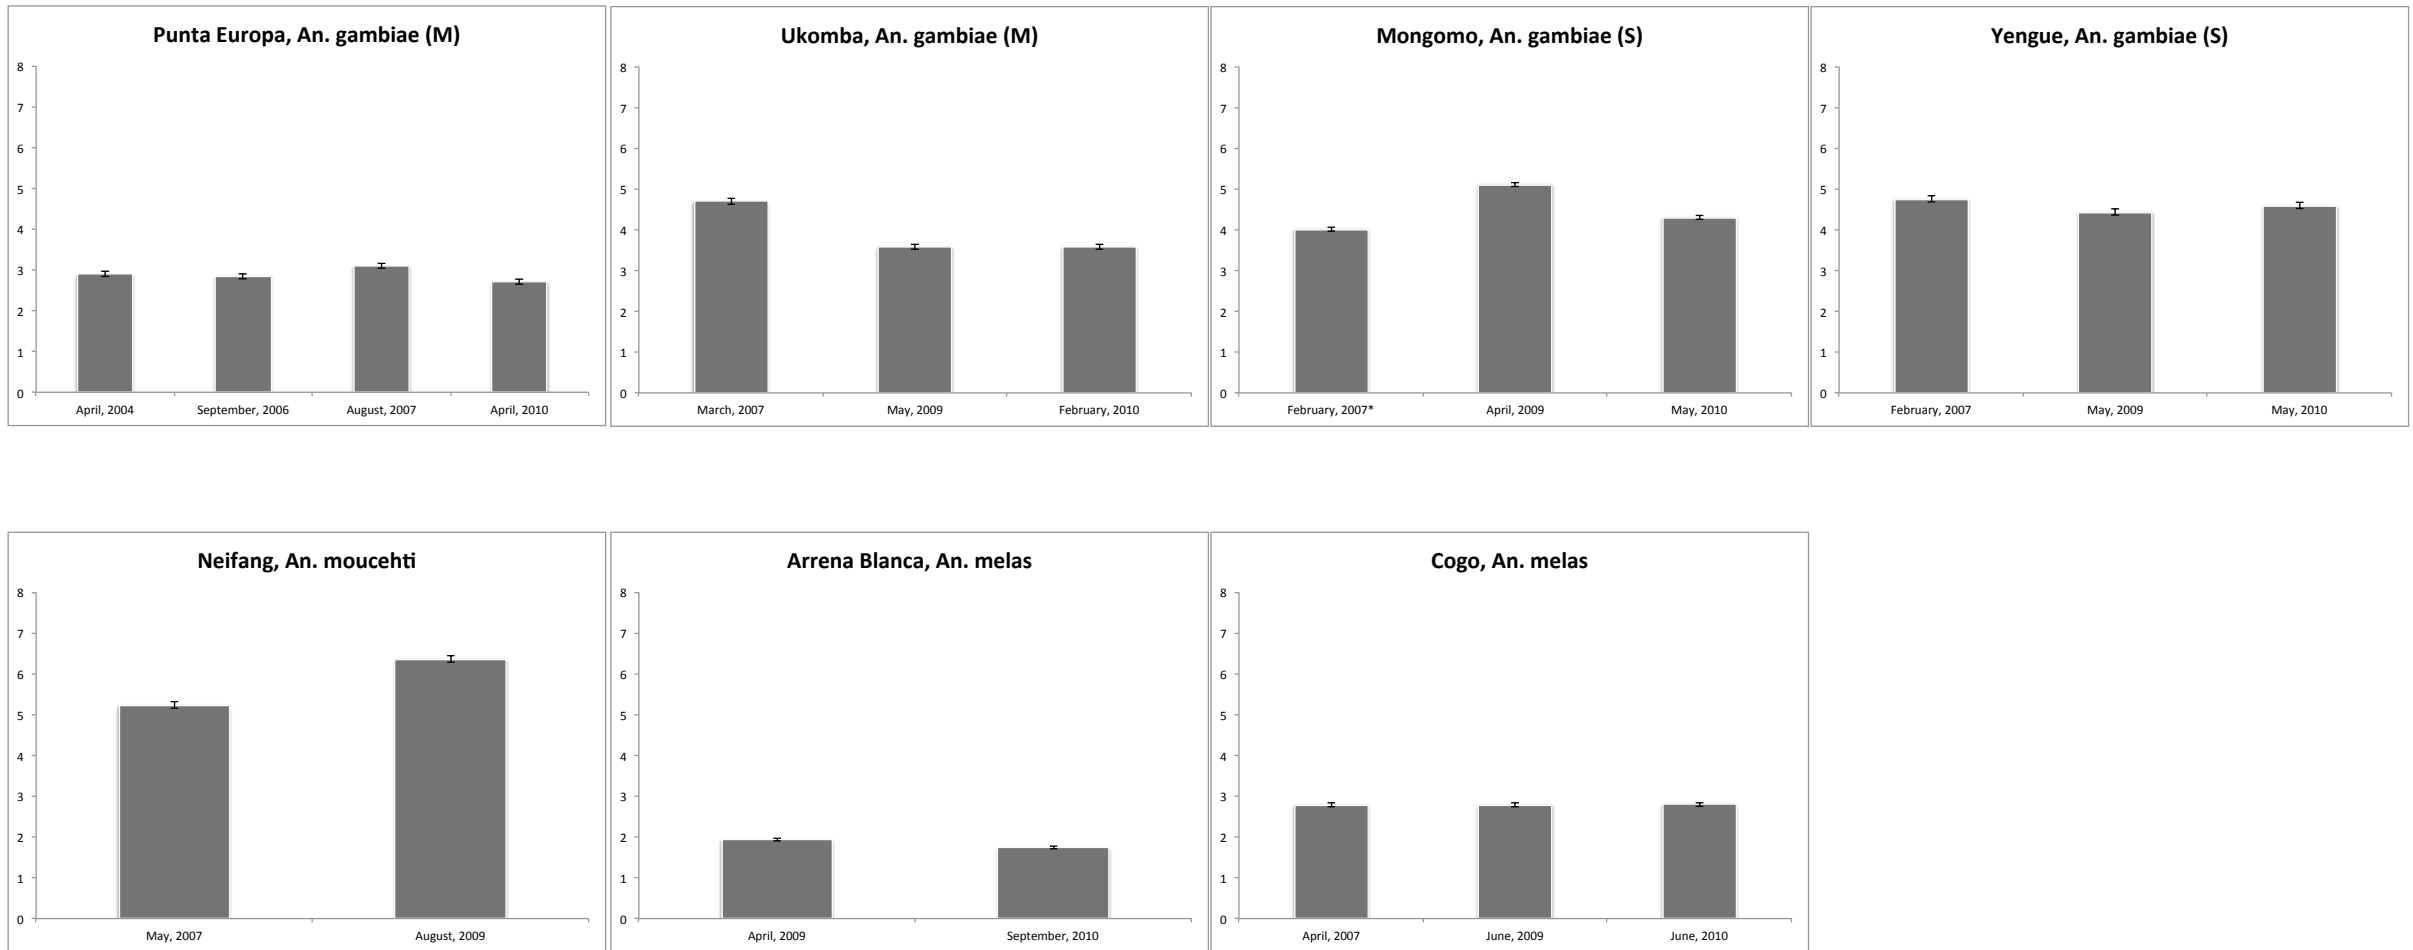

Sample Time Points
